# Supplementary material for: Modification of Disinfection Process at a Local Water Treatment Plant—Skawina (Poland)
Source: MDPI journal article supplement (doi:10.3390/w14182924), 2022-09-18
Supplement: s1 [file s1]

## Tables

Table 1. Selected physico-chemical parameters of water from the WTP Skawina treated with ozone (step 1- sample collected on 01/03/2018)

Table 2. Selected physico-chemical parameters of water from the WTP Skawina treated with chlorine exclusively (step 2- sample collected on 05/08/2018)

Table 3. Selected physico-chemical parameters of water from the WTP Skawina treated with ozone (step 3- sample collected on 06/08/2018)

## Figures

Figure 1. Water treatment line at WTP Skawina

Figure 2. Mobile ozonation system

Figure 3. Chlorine and ozone concentration in water after disinfection

Figure 4. THM concentration in treated water (data provided by the State Sanitary Inspectorate, the Health Inspectorate, Water Works in Kraków and test results- table 1,2,3)

Figure 5. Concentration of bromine, bromide and bromates in raw (1S) water, after filtration and UV radiation (2S), after disinfection (3S) and at the user's home (Ra)

Figure 6. Parameters of water in the water treatment line (TOC, absorbance and total bromine concentration raw water (1S)), water after filtration (2S) and after disinfection (3S)).

## Supporting Information

Table S1. Microbiology of water supplied to the public water distribution network (data provided by the WTP Skawina 2017-2021)

Table S2. Bromate concentrations in sodium hypochlorite and in treated waters

Figure S1. Microbiology of surface waters (Skawinka River)- test data provided by the State Sanitary Inspectorate (cfu – colony forming unit)

Figure S2. Free chlorine in drinking water, supplied by the WTP Skawina, according to the report by State Sanitary Inspectorate
