# Supplementary material for: Modification of Disinfection Process at a Local Water Treatment Plant—Skawina (Poland)
Source: MDPI journal article supplement (doi:10.3390/w14182924), 2022-09-18
Supplement: s1 [file s1]

**Table S2.** Bromate concentrations in sodium hypochlorite and in treated waters.

| Country | Number of water treatment works | BrO <sub>3</sub> <sup>-</sup> in sodium hypochlorite [mg/L] | BrO <sub>3</sub> <sup>-</sup> in treated waters [µg/L] | References |
|---------|---------------------------------|-------------------------------------------------------------|--------------------------------------------------------|------------|
| Canada  | 16                              | 5.4 - 47.8                                                  | 0.5 - 11.2                                             | [36]       |
| USA     | 40                              | 12 - 35                                                     | 0.46 - 7.7                                             | [47]       |
| France  | 3                               | 82 - 857                                                    | 3 - 7                                                  | [48]       |
| Japan   | 28                              | 96 (mean) - 414                                             | <10                                                    | [49]       |
| Spain   | 261                             | 219-7684 (median) 1022                                      | 1.0-49                                                 | [50]       |

## References

36. Aranda-Rodriguez, R.; Lemieux, F.; Jin, Z.; Hnatiw, J.; Tugulea, A-M. (Yet more) challenges for water treatment plants: potential contribution of hypochlorite solutions to bromate, chlorate, chlorite and perchlorate in drinking water. *J Water Supply Res. Technol.* **2017**, *66*, 621-631. doi:10.2166/aqua.2017.147.
47. Weinberg H.S.; Delcomyn C. A.; Unnam V. Bromate in chlorinated drinking waters: occurrence and implications for future regulation, *Environ. Sci. Technol.* **2003**, *37*, 3104-3110. doi:10.1021/es026400z.
48. Bouland, S.; Duguet, J-P.; Montiel, A. Evaluation of bromate ions level introduced by sodium hypochlorite during post-disinfection of drinking water. *Environ. Technol.* **2005**, *26*, 121-125. doi:10.1080/09593332608618572.
49. Asami, M.; Kosaka, K.; Kunikane, S. Bromate, chlorate, chlorite and perchlorate in sodium hypochlorite solution used in water supply. *J Water Supply Res. Technol.* **2009**, *58*, 107-115, doi:10.2166/aqua.2009.014.
50. Garcia-Villanova, R.J.; Oliveira Dantas Leite, M.V.; Hernández Hierro, J.M.; De Castro Alfageme S.; García Hernández García C. Occurrence of bromate, chlorite and chlorate in drinking waters disinfected with hypochlorite reagents. Tracing their origins. *Sci. Total Environ.* **2010**, *408*, 2616-2620. doi:10.1016/j.scitotenv.2010.03.011.
