# Supplementary material for: Modification of Disinfection Process at a Local Water Treatment Plant—Skawina (Poland)
Source: MDPI journal article supplement (doi:10.3390/w14182924), 2022-09-18
Supplement: s1 [file s1]

**Table S1.** Microbiology of water supplied to the public water distribution network (data provided by the WTP Skawina, 2017-2021)

| Data<br>[day/month/year] | Microorga-<br>nisms<br>[unit] | Coliform<br>bacteria<br>[MPN/<br>100ml] | <i>Escherichia<br/>coli</i><br>[MPN/<br>100ml] | <i>Clostridium<br/>perfringens</i><br>[cfu<br>100ml] | Fecal<br>enterococci<br>[cfu<br>100ml] | TNM at<br>(22±2)°C<br>after 72 h<br>[cfu<br>/1ml] |
|--------------------------|-------------------------------|-----------------------------------------|------------------------------------------------|------------------------------------------------------|----------------------------------------|---------------------------------------------------|
| 06/06/2017               | 0                             | 0                                       | 0                                              | 0                                                    | 0                                      | 45                                                |
| 25/09/2017               | 0                             | 0                                       | 0                                              | 0                                                    | 0                                      | 1                                                 |
| 11/10/2017               | 0                             | 0                                       | 0                                              | 0                                                    | 0                                      | 1                                                 |
| 12/12/2017               | 0                             | 0                                       | 0                                              | 0                                                    | 0                                      | 2                                                 |
| 03/01/2018               | 0                             | 0                                       | -                                              | -                                                    | -                                      | -                                                 |
| 28/02/2018               | 0                             | 0                                       | 0                                              | 0                                                    | -                                      | -                                                 |
| 08/05/2018               | 0                             | 0                                       | 0                                              | 0                                                    | 0                                      | 0                                                 |
| 08/05/2018               | 0                             | 0                                       | 0                                              | 0                                                    | 0                                      | 2                                                 |
| 04/06/2018               | 0                             | 0                                       | 0                                              | 0                                                    | 0                                      | 43                                                |
| 04/06/2018               | 0                             | 0                                       | 0                                              | 0                                                    | 0                                      | 18                                                |
| 05/06/2018               | 0                             | 0                                       | -                                              | -                                                    | -                                      | -                                                 |
| 12/06/2018               | 0                             | 0                                       | 0                                              | 0                                                    | 0                                      | 3                                                 |
| 04/06/2018               | 0                             | 0                                       | 0                                              | 0                                                    | 0                                      | 12                                                |
| 19/06/2018               | -                             | -                                       | -                                              | -                                                    | -                                      | 2                                                 |
| 12/02/2019               | 0                             | 0                                       | 0                                              | 0                                                    | 0                                      | 0                                                 |
| 16/09/2019               | -                             | -                                       | 0                                              | 0                                                    | 0                                      | 0                                                 |
| 14/09/2020               | -                             | -                                       | 0                                              | 0                                                    | 0                                      | 1                                                 |
| 12/03/2021               | -                             | -                                       | 0                                              | 0                                                    | 0                                      | 0                                                 |
| 26/05/2021               | -                             | -                                       | 0                                              | 0                                                    | 0                                      | 0                                                 |
